# Supplementary material for: Exercise Suppresses Head and Neck Squamous Cell Carcinoma Growth via Oncostatin M
Source: MDPI journal article supplement (doi:10.3390/cancers16061187), 2024-03-18
Supplement: s1 [file s1]

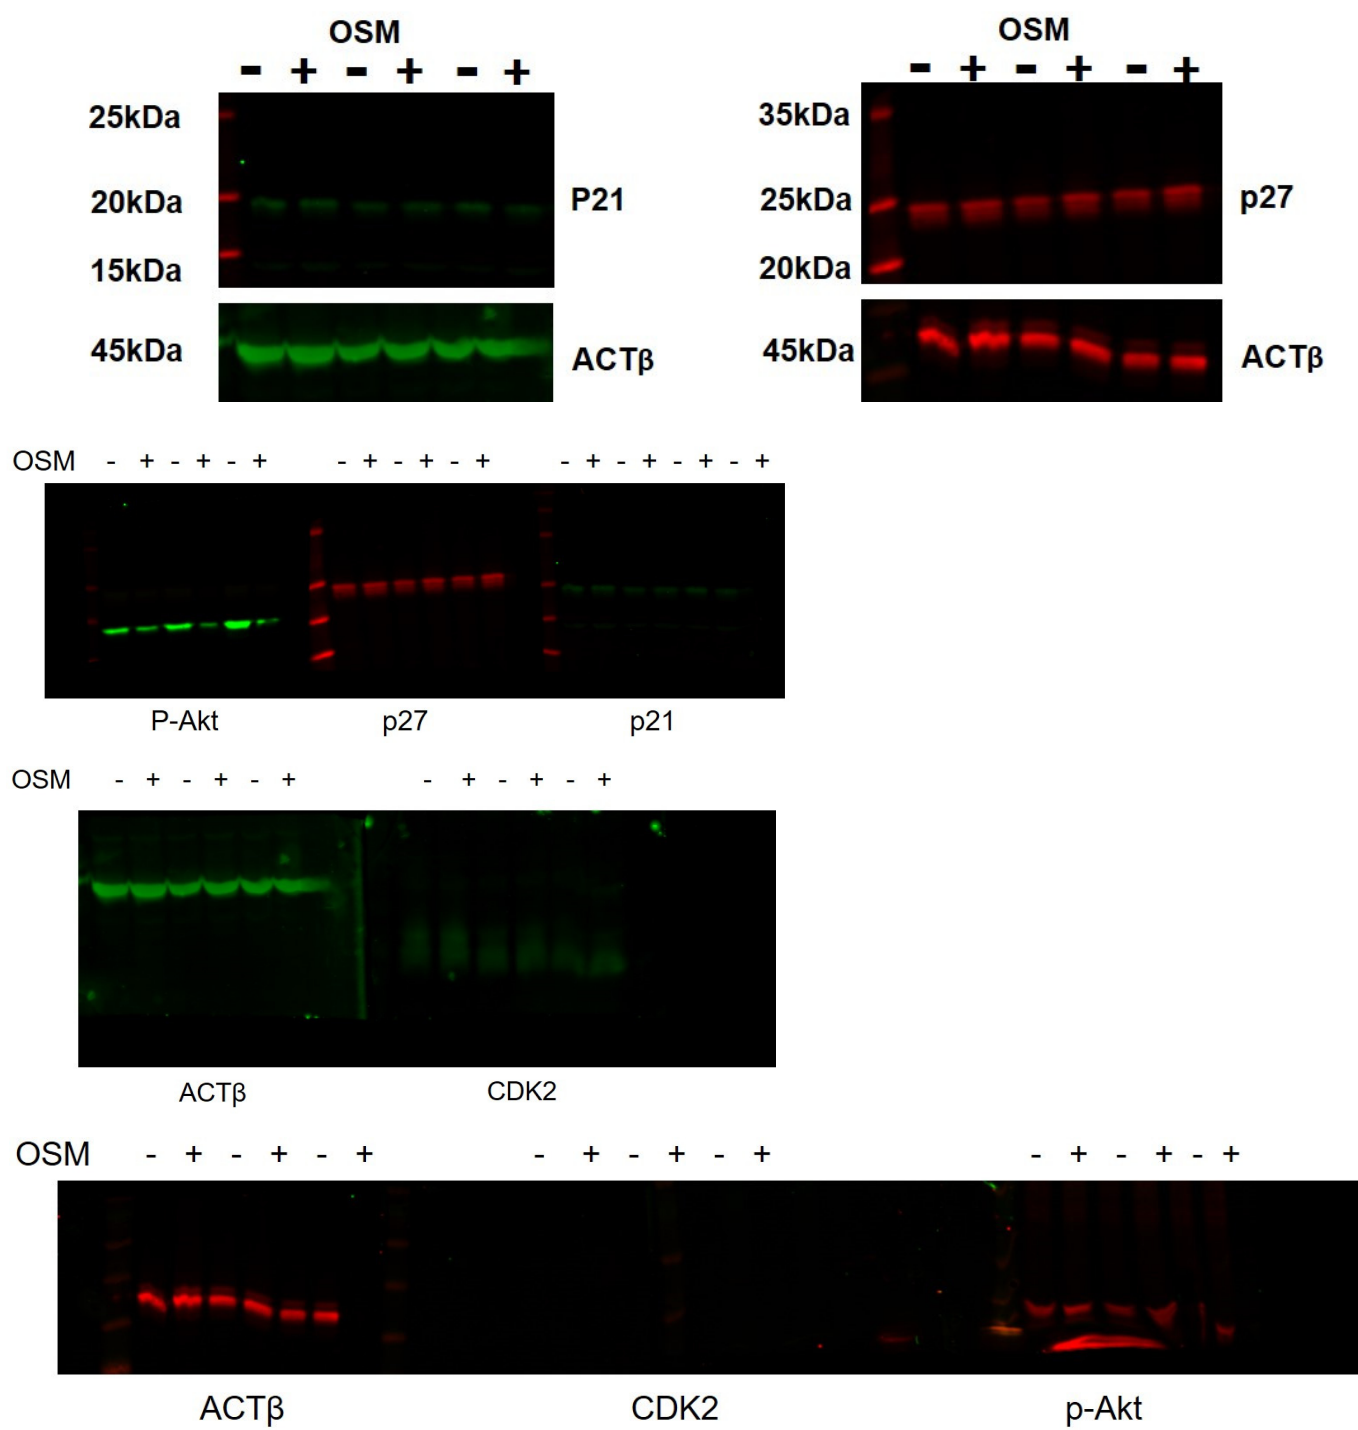

**Figure S1.** Correspond to the values of p21 and p27 in Figure 6.

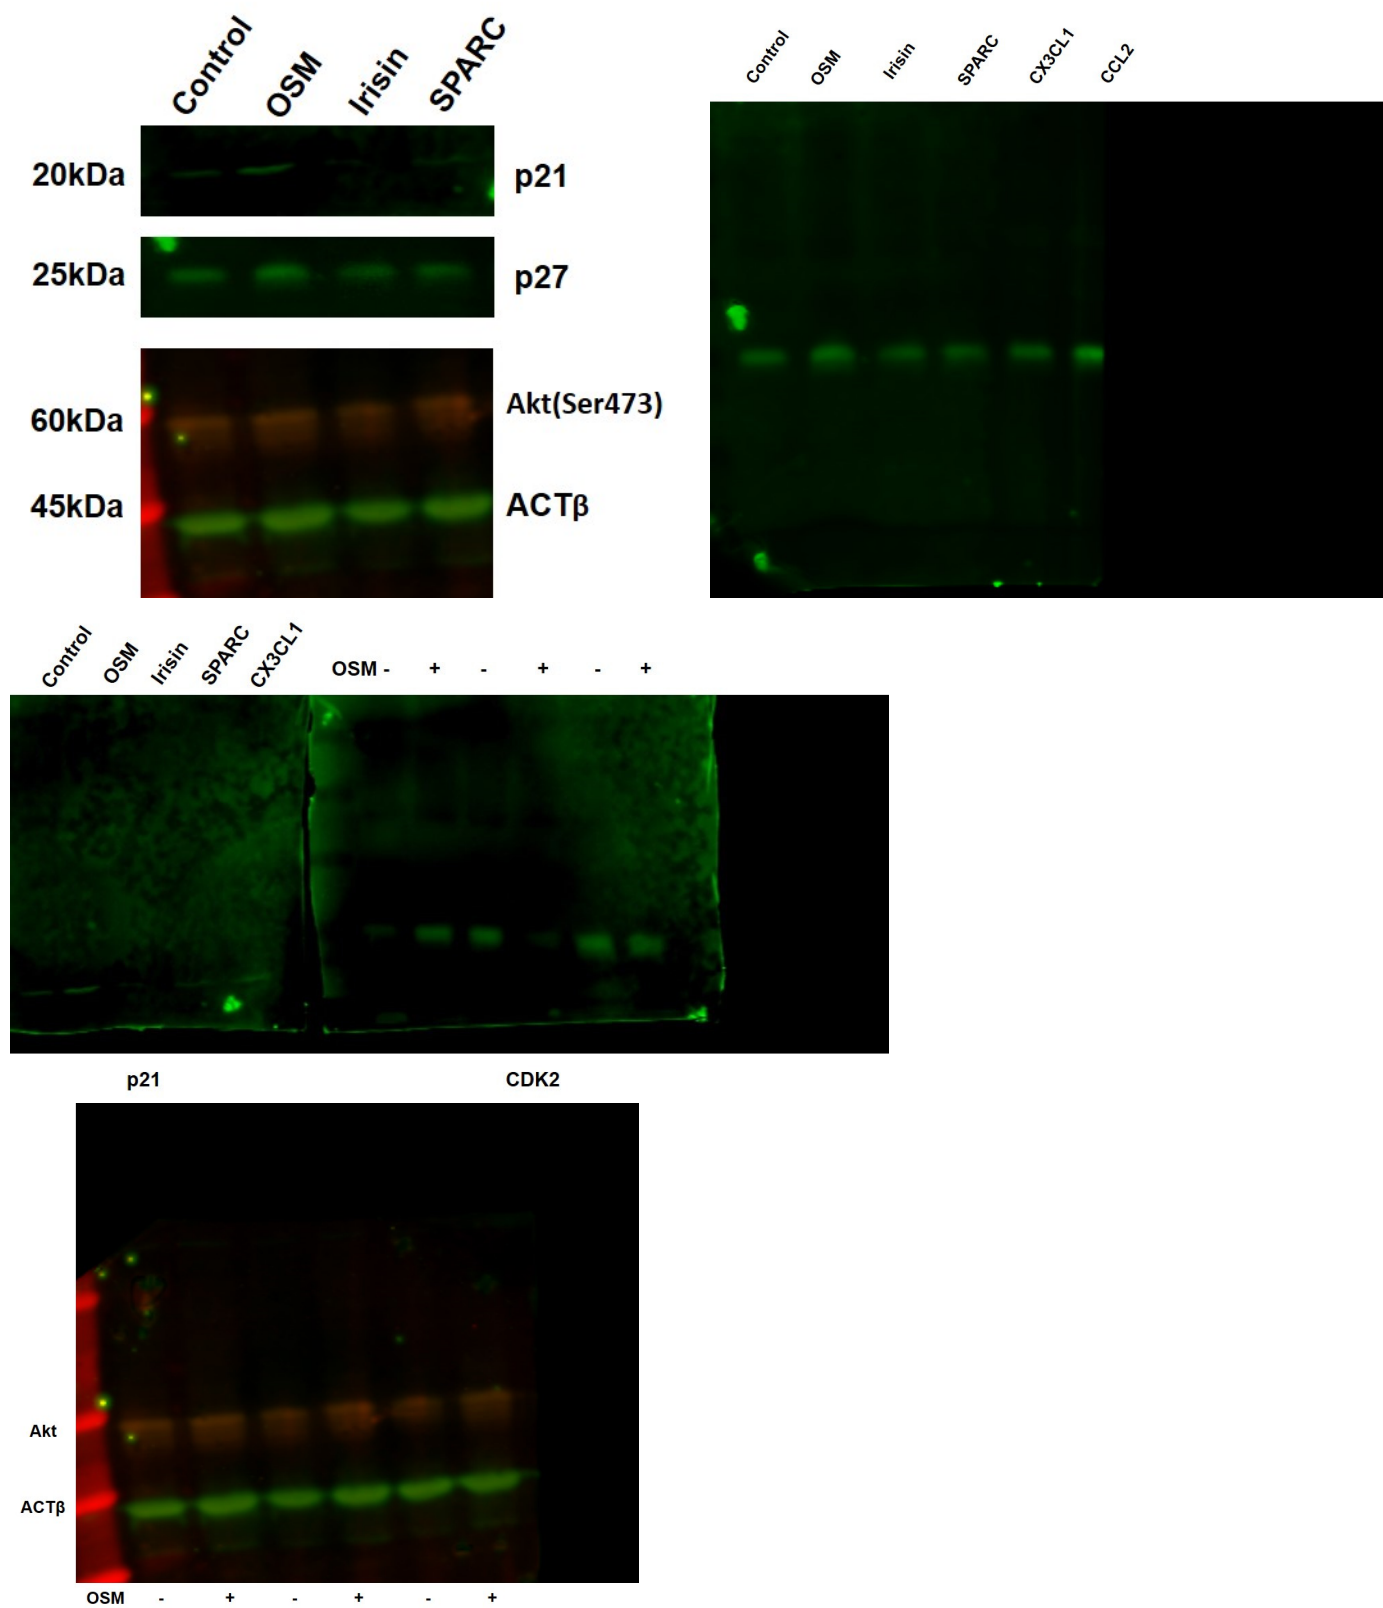

**Figure S2.** Corresponds to the p21 and p27 bands in Figure 6.

**Table S1.** Source data for Figure 6.

| Target            | Integrated Den-<br>sity Control 1  | Integrated Den-<br>sity OSM 1     | Integrated Den-<br>sity Control 2  | Integrated Den-<br>sity OSM 2     | Integrated Den-<br>sity Control 3  | Integrated Den-<br>sity OSM 3     |
|-------------------|------------------------------------|-----------------------------------|------------------------------------|-----------------------------------|------------------------------------|-----------------------------------|
| p21               | 256                                | 387                               | 177                                | 330                               | 245                                | 231                               |
| p27               | 1240                               | 2010                              | 1270                               | 1830                              | 1105                               | 2124                              |
| ACT $\beta$ (p21) | 26000                              | 23700                             | 15950                              | 18800                             | 20500                              | 11280                             |
| ACT $\beta$ (p27) | 5200                               | 4740                              | 3190                               | 3430                              | 3800                               | 3760                              |
| Target            | Relative Expres-<br>sion Control 1 | Relative Expres-<br>sion<br>OSM 1 | Relative Expres-<br>sion Control 2 | Relative Expres-<br>sion<br>OSM 2 | Relative Expres-<br>sion Control 3 | Relative Expres-<br>sion<br>OSM 3 |
| p21               | 0.009846154                        | 0.016329114                       | 0.011097179                        | 0.017553191                       | 0.01195122                         | 0.020478723                       |
| p27               | 0.238461538                        | 0.424050633                       | 0.398119122                        | 0.533527697                       | 0.29078947                         | 0.564893617                       |
